# Supplementary material
Source: PubMed Central journal article supplement (PMC1174975)

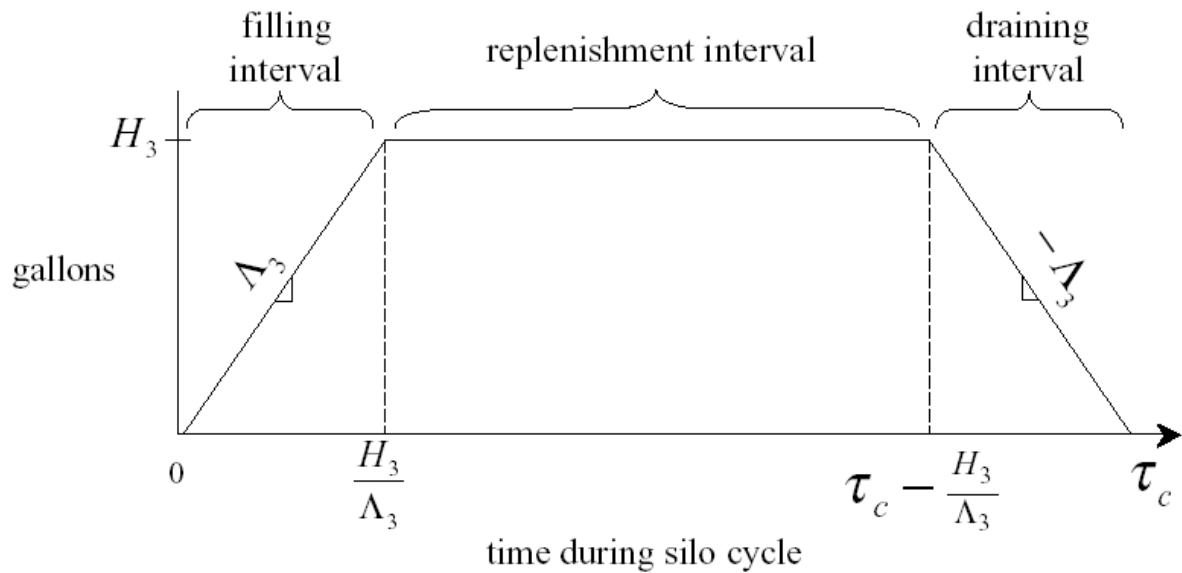

Supplement: pnas_0408526102_2.pdf [file pnas_0408526102_2.pdf]

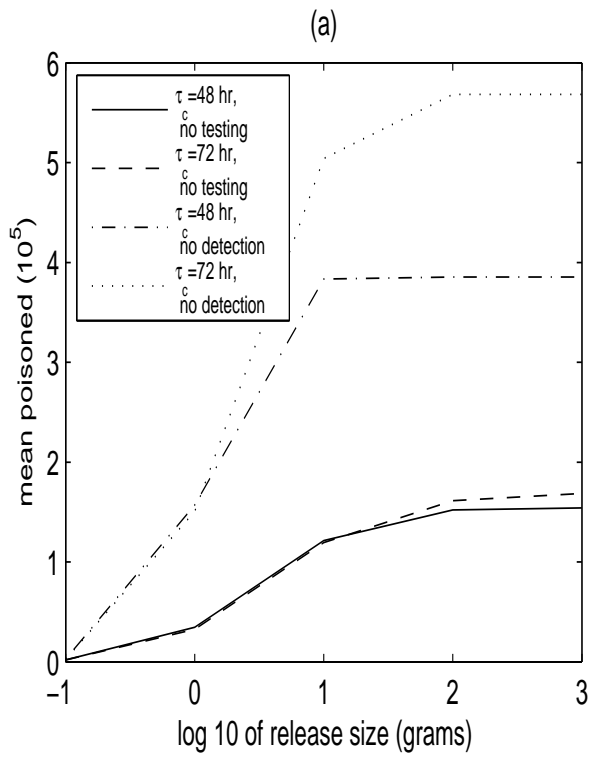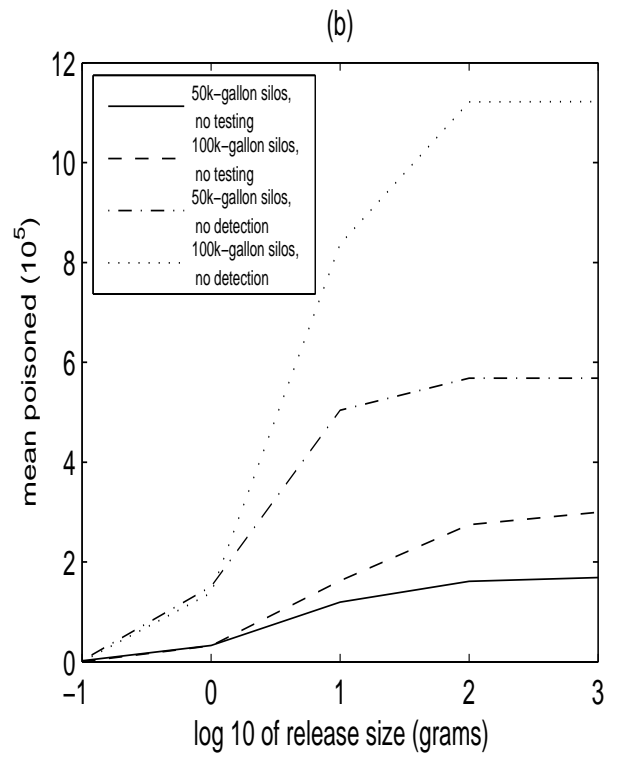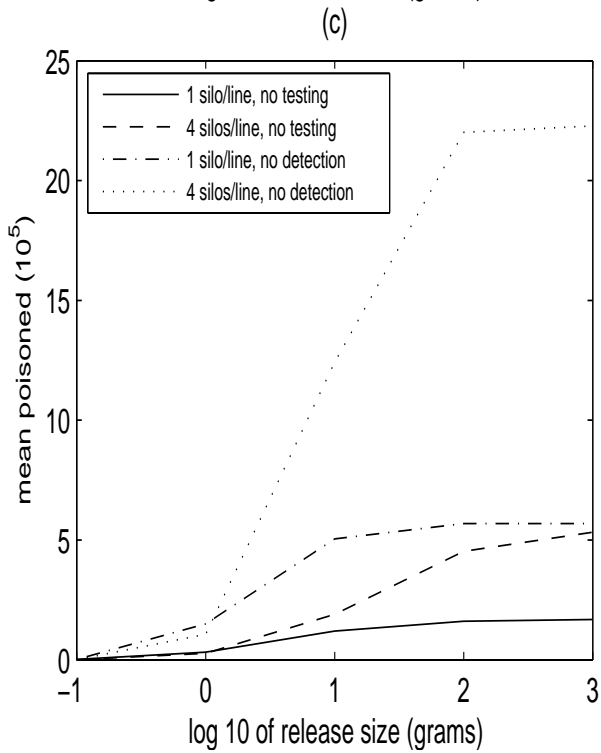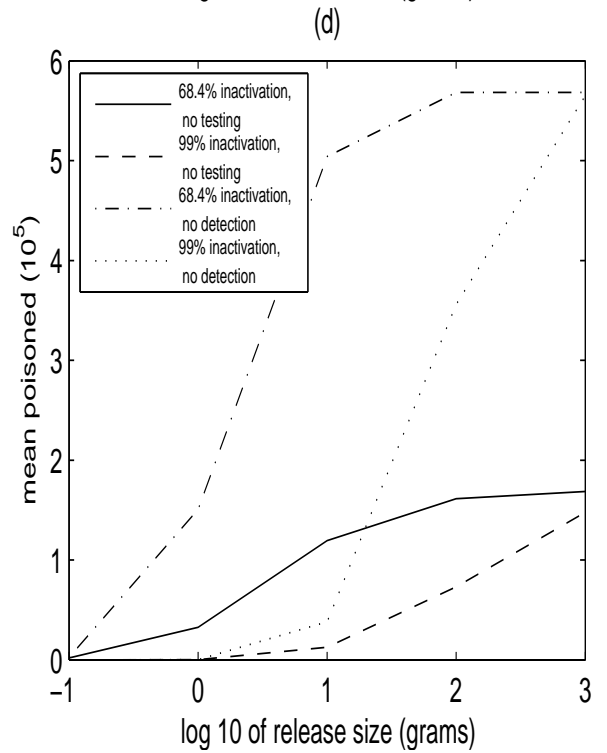

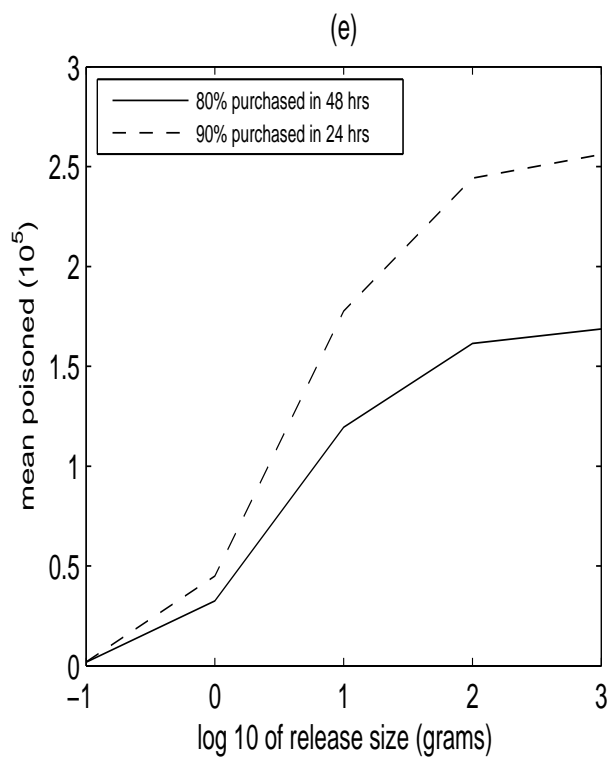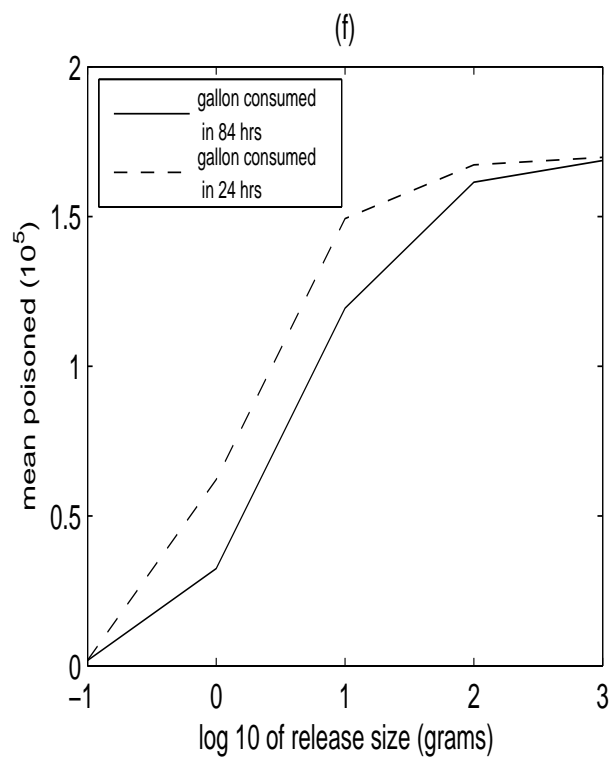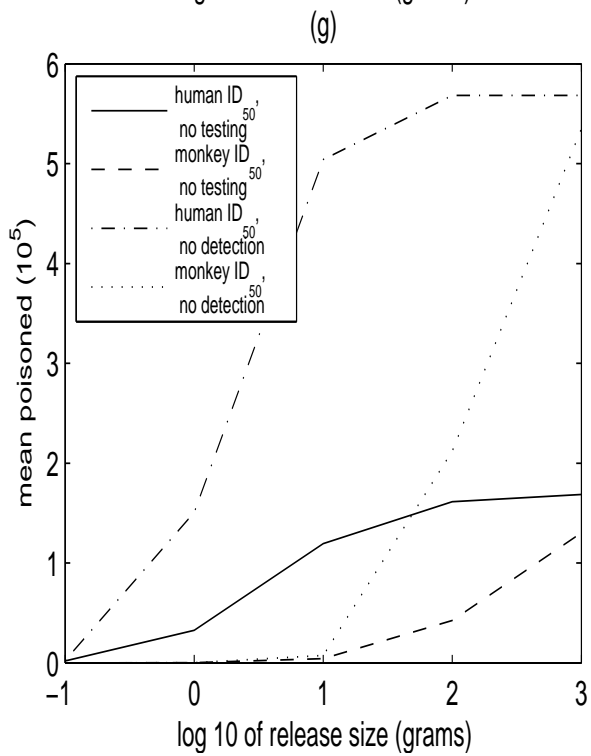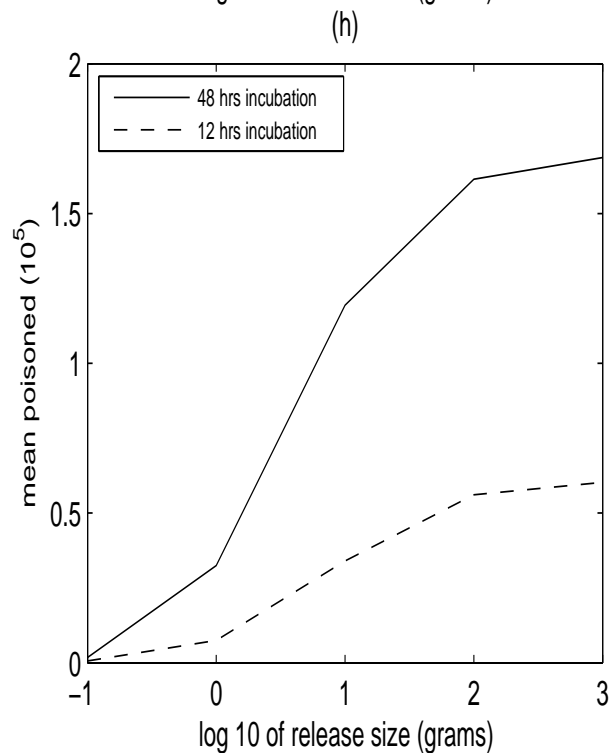

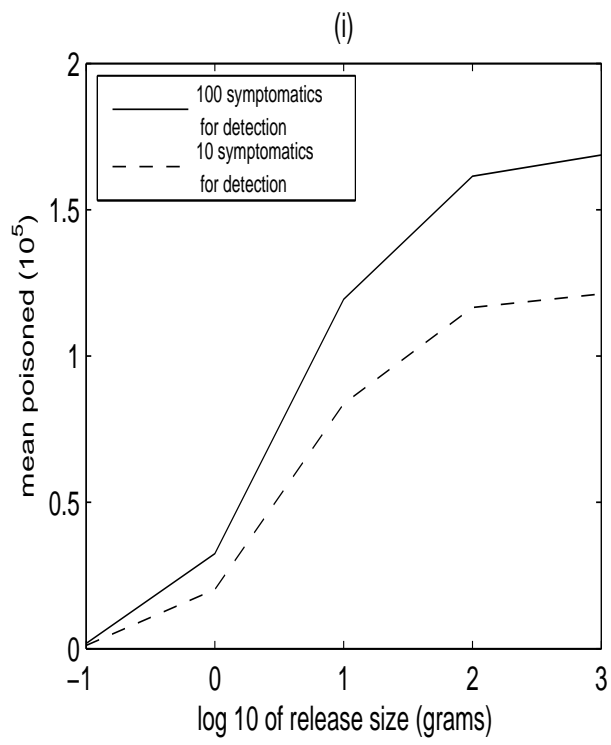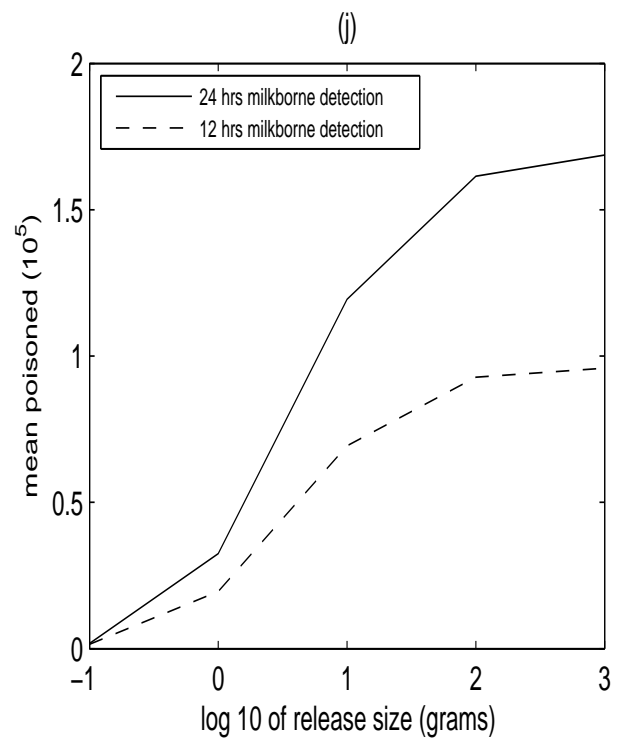

Supplement: pnas_0408526102_3.pdf [file pnas_0408526102_3.pdf]
